# Supplementary figures and images for: Systematical Identification of Breast Cancer-Related Circular RNA Modules for Deciphering circRNA Functions Based on the Non-Negative Matrix Factorization Algorithm
Source: MDPI journal article supplement (doi:10.3390/ijms20040919), 2019-02-20

Module 1

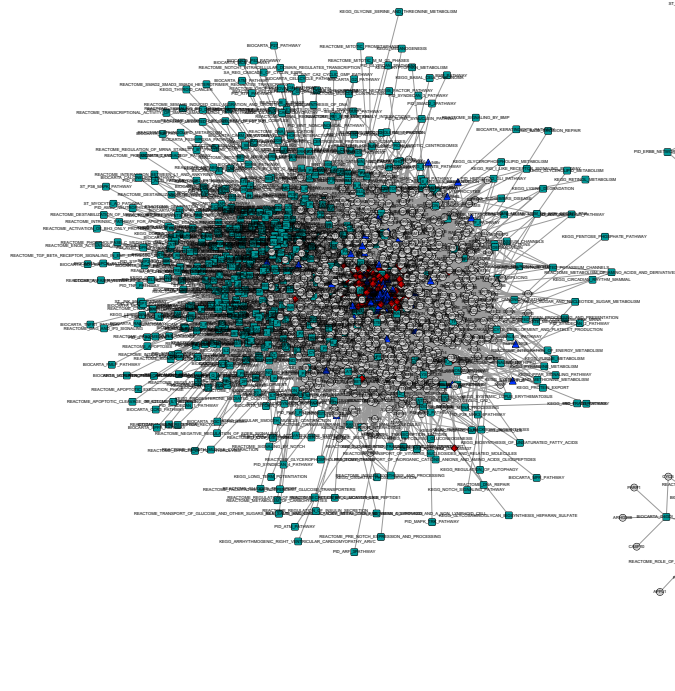

Module 2

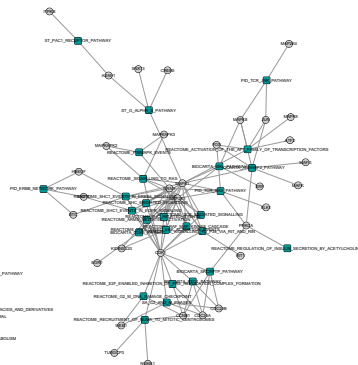

Module 3

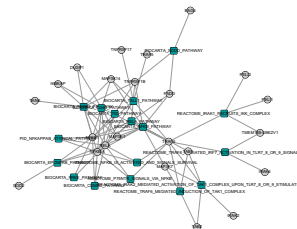

Module 4

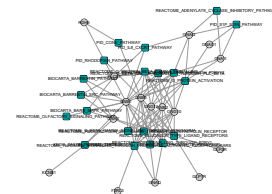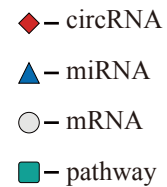

Module 5

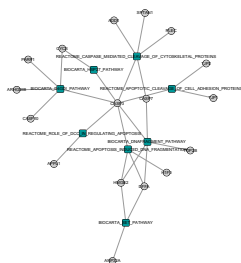

Module 6

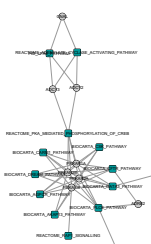

Module 7

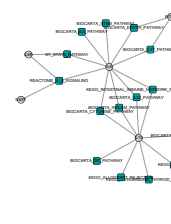

Module 8

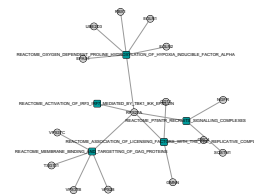

Supplement: s1 [file s1]
